# Supplementary material for: Genomewide Analysis of Carotenoid Cleavage Dioxygenases in Unicellular and Filamentous Cyanobacteria
Source: Hindawi journal article supplement (doi:10.1155/2012/164690), 2012-01-01
Supplement: f1 [file 164690.f1.pdf]

Additional file 1- Table 1 Lists of kea features and genomes information from cyanobacterial strains analyzed in this paper. Note: HL, high light adaptation; LL, low light adaptation; GS, genome size

| Species                          |             | Kea        | Features          | GS<br>(Mb) | Genes |
|----------------------------------|-------------|------------|-------------------|------------|-------|
| <i>T. elongatus</i> BP-1         | unicellular | hot-spring | thermophile       | 2.59       | 2,528 |
| <i>N. punctiforme</i> ATCC 29133 | filamentous | freshwater | nitrogen fixation | 9.06       | 6,794 |
| <i>A. variabilis</i> ATCC 29413  | filamentous | freshwater | nitrogen fixation | 7.07       | 5,724 |
| <i>A. sp.</i> PCC 7120           | filamentous | soil       | nitrogen fixation | 7.21       | 6,223 |
| <i>A. platensis</i> NIES-39      | filamentous |            | nitrogen fixation | 6.79       | 6,676 |
| <i>T. erythraeum</i> IMS101      | filamentous | marine     | nitrogen fixation | 7.75       | 4,498 |
| <i>A. marina</i> MBIC11017       | unicellular |            |                   | 8.36       | 8,462 |
| <i>C. sp.</i> PCC 7425           | unicellular | freshwater | nitrogen fixation | 5.79       | 5,380 |
| <i>C. sp.</i> ATCC 51142         | unicellular | freshwater | nitrogen fixation | 5.46       | 5,359 |
| <i>C. sp.</i> PCC 8801           | unicellular | freshwater | nitrogen fixation | 4.79       | 4,416 |
| <i>C. sp.</i> PCC 7424           | unicellular | freshwater | nitrogen fixation | 6.55       | 5,763 |
| <i>M. aeruginosa</i> NIES-843    | unicellular | freshwater | toxic bloom       | 5.84       | 6,363 |
| <i>S. sp.</i> PCC 7002           | unicellular | marine     |                   | 3.41       | 3,235 |
| <i>S. elongatus</i> PCC 6301     | unicellular | freshwater |                   | 2.75       | 2,580 |
| <i>S. elongatus</i> PCC 7942     | unicellular | freshwater |                   | 2.74       | 2,715 |
| <i>G. violaceus</i> PCC 7421     | unicellular | marine     |                   | 4.66       | 4,484 |
| <i>S. sp.</i> PCC 6803           | unicellular | freshwater |                   | 3.96       | 3,725 |
| <i>S. sp.</i> RCC307             | unicellular | marine     |                   | 2.22       | 2,583 |
| <i>S. sp.</i> CC9311             | unicellular | marine     |                   | 2.61       | 2,944 |
| <i>S. sp.</i> WH 7803            | unicellular | marine     |                   | 2.37       | 2,586 |
| <i>S. sp.</i> WH8102             | unicellular | marine     |                   | 2.44       | 2,579 |
| <i>S. sp.</i> CC9605             | unicellular | marine     |                   | 2.51       | 2,692 |
| <i>S. sp.</i> CC9902             | unicellular | marine     |                   | 2.23       | 2,355 |
| <i>P. marinus</i> str. MIT 9303  | unicellular | marine     | 100m, LL          | 2.68       | 3,049 |
| <i>P. marinus</i> MIT9313        | unicellular | marine     | 135m, LL          | 2.41       | 2,326 |
| <i>P. marinus</i> SS120          | unicellular | marine     | LL                | 1.75       | 1,928 |
| <i>P. marinus</i> str. MIT 9211  | unicellular | marine     | 83m, LL           | 1.67       | 1,900 |
| <i>P. marinus</i> MED4           | unicellular | marine     | 5m, HL            | 1.66       | 1,756 |
| <i>P. marinus</i> MIT9312        | unicellular | marine     | 132m, HL          | 1.71       | 2,007 |
| <i>P. marinus</i> str. MIT 9215  | unicellular | marine     | HL                | 1.74       | 2,025 |
| <i>P. marinus</i> str. MIT 9301  | unicellular | marine     | 90m, HL           | 1.64       | 1,949 |
| <i>P. marinus</i> str. AS9601    | unicellular | marine     | 50m, HL           | 1.67       | 1,964 |
| <i>P. marinus</i> str. MIT 9515  | unicellular | marine     | 15m, HL           | 1.70       | 1,948 |
| <i>P. marinus</i> str. NATL1A    | unicellular | marine     | 30m, LL           | 1.86       | 2,236 |
| <i>P. marinus</i> str. NATL2A    | unicellular | marine     | 10m, LL           | 1.84       | 2,207 |
| <i>S. sp.</i> JA-3-3Ab           | unicellular | hot-spring |                   | 2.93       | 2,815 |
| <i>S. sp.</i> JA-2-3B'a(2-13)    | unicellular | hot-spring |                   | 3.05       | 2,914 |
